# Supplementary material for: Midwives’ Survey of Their Weight Management Practice Before and After the GLOWING Guideline Implementation Intervention: A Pilot Cluster Randomised Controlled Trial
Source: Research Square preprint supplement (doi:10.21203/rs.3.rs-1130985/v1), 2021-12-13
Supplement: Supplementary file 2 [file 67e1f50a3340777ea29fe82c.docx]

**Additional file 1: Flowchart of NICE Guideline behaviours relevant to midwifery practice grouped into thematic behaviour categories and sub-categories for communication-related behaviours and behaviour support/intervention-related behaviours.**


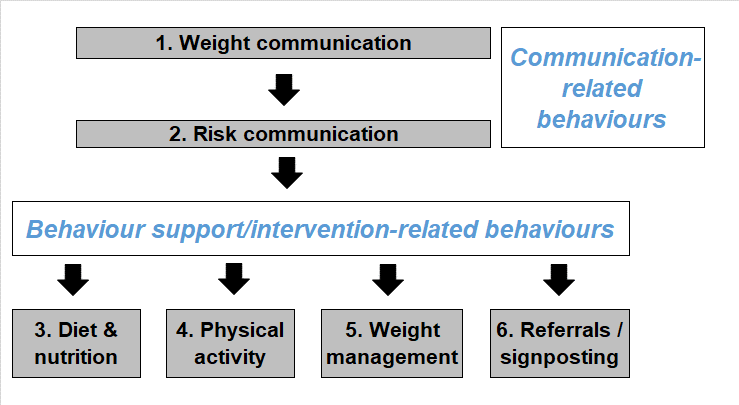


Note, Behaviour categories and sub-categories are:

1. Communication-related behaviours (sub-categories: weight communication and risk communication)

2. Support and intervention-related behaviours (sub-categories diet and nutrition, physical activity, weight management, referrals and signposting)
